# Supplementary material for: Phylogenetic and Molecular Analysis of the Porcine Epidemic Diarrhea Virus in Mexico during the First Reported Outbreaks (2013–2017)
Source: MDPI journal article supplement (doi:10.3390/v16020309), 2024-02-18
Supplement: s1 [file s1]

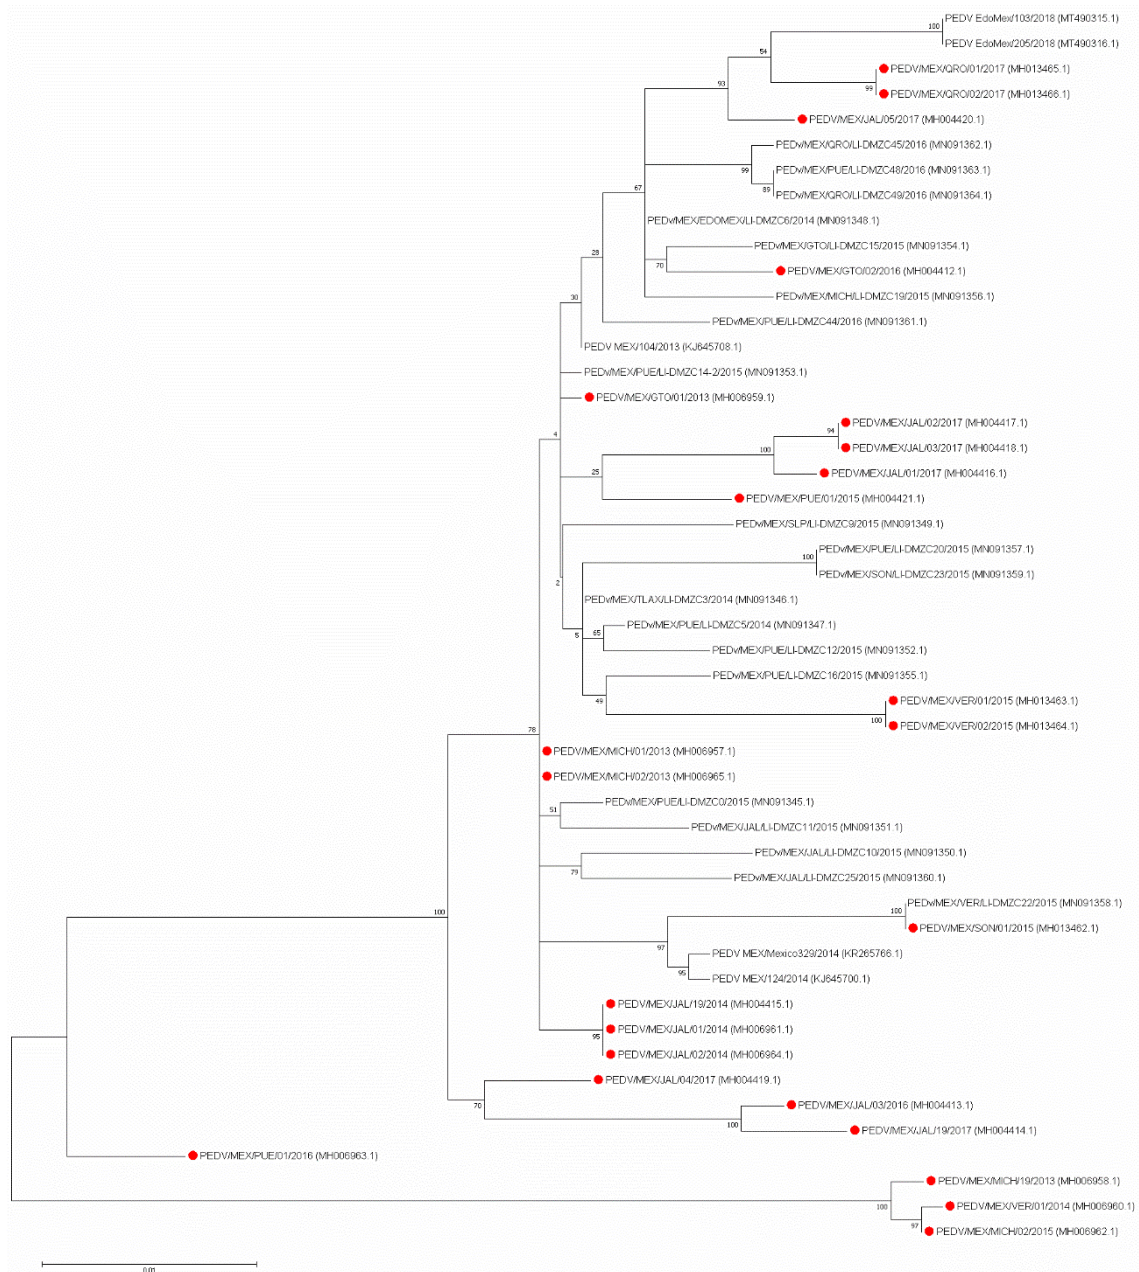

**Supplementary Figure S1. Phylogenetic analyses of mexican PEDV spike protein sequences constructed by means of a maximum likelihood algorithm and 1000 bootstraps. The strains from this study are marked with a red circle. Phylogenetic tree of the S protein constructed with the model JTT+G+I (scale bar: 0.01).**
